# Supplementary material
Source: Springer Nature journal article supplement (https://www.springermedizin.de/resource/supplementary/13075_2012_3818_MOESM4_ESM.pdf/9695414)

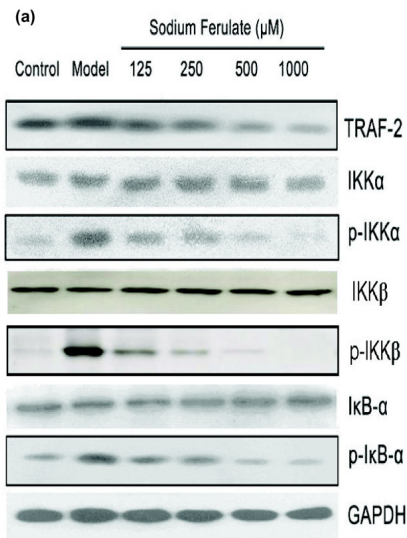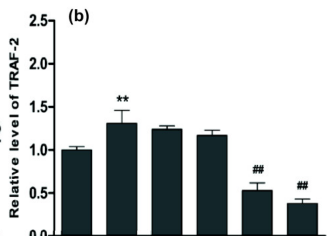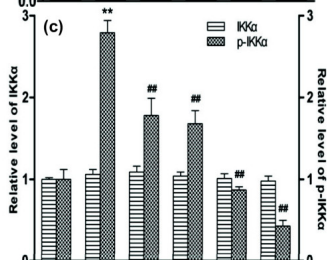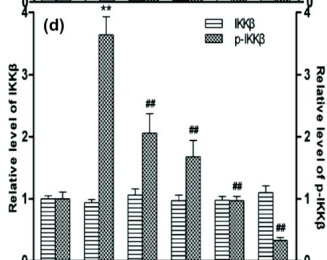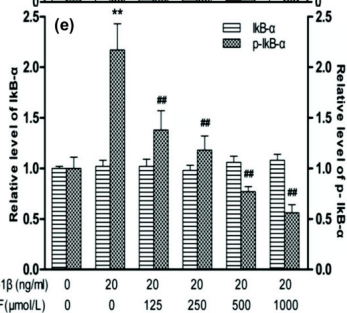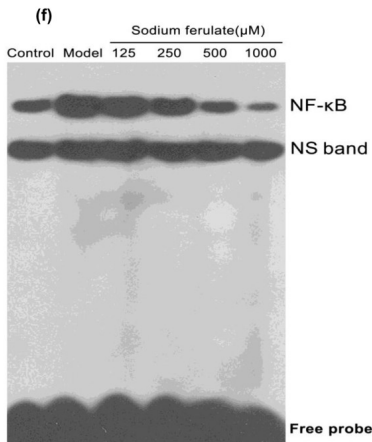

IL-1 $\beta$  (ng/ml) 0 20 20 20 20 20  
SF( $\mu\text{mol/L}$ ) 0 0 125 250 500 1000

Supplement: MOESM4 [file 9695414]
